# Supplementary material for: Anne O'Tate: A tool to support user-driven summarization, drill-down and browsing of PubMed search results
Source: Springer Nature journal article supplement (doi:10.1186/1747-5333-3-2), 2008-01-01
Supplement: 13009_2007_26_MOESM1_ESM.pdf [file 13009_2007_26_MOESM1_ESM.pdf]

### Step 0 (Initialization):

$D$  = the set of the documents to be clustered

$D_m$  = the set of documents in  $D$  indexed with a given MeSH term  $m$  (for each  $m$  in  $M$ )

$N_m$  = the number of documents in  $D$  indexed with a given MeSH term  $m$  (for each  $m$  in  $M$ )

$M$  = the set of MeSH terms collected from all documents in  $D$  (after removing the terms that are given on a stoplist of the top 20 most frequent in MEDLINE, and removing each term  $m$  for which the relative document frequency  $|D_m|/|D|$  is  $> 1/3$ )

$i = 0$  (cluster number)

### Step 1 (Iterations):

WHILE ( $i = i + 1 < 15$  and  $M \neq \emptyset$ ) {

$L_i = m$  in  $M: N_m \geq N_n$  for all  $n$  in  $M$  (identifies the label for the  $i$ -th cluster)

$C_i = D_m$  (assigns a set of papers to the  $i$ -th cluster  $C_i$ )

$D = D - D_m$  (removes the papers in the  $i$ -th cluster from being considered for the potential "Miscellaneous" cluster, and from contributing to the counts of the remaining MeSH terms)

$N_n$  = number of remaining documents in  $D$  with a given MeSH term  $n$  (for each  $n$  in  $M$ )

$M = M - m$  and its children\* (removes the  $i$ -th cluster label and its children from further consideration)

}

IF ( $D \neq \emptyset$ ) {

$i = i + 1$

$L_i =$  "Miscellaneous"

$C_i = D$

}

$n = i$

**Step 2 (Output Clusters):** List of cluster labels  $L_i$ 's each with a corresponding set of documents  $C_i$ 's for  $i = 1, 2, \dots, n$ , displayed in order of decreasing size of the document clusters.

\*Given two MeSH terms  $m$  and  $n$ ,  $m$  is considered a child of  $n$  if  $m$  occurs below  $n$  in the MeSH hierarchy.

Notice that the counts ( $N_m$ 's) are reduced during the execution of the WHILE loop, whereas the document sets ( $D_m$ 's) stay the same. Thus, each document may be assigned to multiple clusters because cluster labels are chosen based on the counts ( $N_m$ 's) and the clusters are based on document sets ( $D_m$ 's),.
