# Supplementary material for: Anne O'Tate: A tool to support user-driven summarization, drill-down and browsing of PubMed search results
Source: Springer Nature journal article supplement (doi:10.1186/1747-5333-3-2), 2008-01-01
Supplement: 13009_2007_26_MOESM2_ESM.pdf [file 13009_2007_26_MOESM2_ESM.pdf]

## Anne O'Tate

Search PubMed for dicer

Go

Clear

Limits

Details

Items 1 - 20 of 447

page

1

of 23

[Next](#)

Terms  
 Important words  
 Topics  
 Authors  
 Affiliations  
 Journals  
 Year  
 Clustered by topic

1: [Leuschner PJ, Martinez J](#)[Related Articles](#)

**In vitro analysis of microRNA processing using recombinant Dicer and cytoplasmic extracts of HeLa cells.**

Methods 2007 Oct  
 PMID: 17889796

2: [Barbato C, Ciotti MT, Serafino A, Calissano P, Cogoni C](#)[Related Articles](#)

**Dicer expression and localization in post-mitotic neurons.**

Brain Res 2007 Aug 22  
 PMID: 17888888

3: [Soifer HS, Rossi JJ, Shtrom P](#)[Related Articles](#)

**MicroRNAs in Disease and Potential Therapeutic Applications.**

Mol Ther 2007 Sep 18  
 PMID: 17878899

4: [Macrae IJ, Zhou K, Doudna JA](#)[Related Articles](#)

**Structural determinants of RNA recognition and cleavage by Dicer.**

Nat Struct Mol Biol 2007 Sep 16  
 PMID: 17873886

5: [Matskevich AA, Moelling K](#)[Related Articles](#)

**Dicer is involved in protection against influenza A virus infection.**

J Gen Virol 2007 Oct 16  
 PMID: 17872512

6: [Nakamura M, Ando R, Nakazawa T, Yudazono T, Tsutsumi N, Hatanaka N, Ohgake T, Hanaoka F, Eki T](#)[Related Articles](#)

**Dicer-related drh-3 gene functions in germ-line development by maintenance of chromosomal integrity in Caenorhabditis elegans.**
