# Supplementary material for: Anne O'Tate: A tool to support user-driven summarization, drill-down and browsing of PubMed search results
Source: Springer Nature journal article supplement (doi:10.1186/1747-5333-3-2), 2008-01-01
Supplement: 13009_2007_26_MOESM3_ESM.pdf [file 13009_2007_26_MOESM3_ESM.pdf]

## Anne O'Tate

Search PubMed 

Go

Clear

Limits

Details

Author 1 - 20 of 1572

page

1

of 79

[Next](#)

Terms  
 Important words  
 Topics  
 Authors  
 Affiliations  
 Journals  
 Year  
 Clustered by topic

|    | Author                         | freq |
|----|--------------------------------|------|
| 1  | <a href="#">Hannon GJ</a>      | 14   |
| 2  | <a href="#">Carrington JC</a>  | 10   |
| 3  | <a href="#">Filipowicz W</a>   | 9    |
| 4  | <a href="#">Rossi JJ</a>       | 9    |
| 5  | <a href="#">Taira K</a>        | 9    |
| 6  | <a href="#">Zamore PD</a>      | 9    |
| 7  | <a href="#">Bartel DP</a>      | 8    |
| 8  | <a href="#">Martienssen RA</a> | 8    |
| 9  | <a href="#">Liu Q</a>          | 7    |
| 10 | <a href="#">Provost P</a>      | 7    |
| 11 | <a href="#">Sontheimer EJ</a>  | 7    |
| 12 | <a href="#">Grewal SI</a>      | 6    |
| 13 | <a href="#">Kasschau KD</a>    | 6    |
| 14 | <a href="#">Kim VN</a>         | 6    |
| 15 | <a href="#">Moazed D</a>       | 6    |
| 16 | <a href="#">Siomi H</a>        | 6    |
| 17 | <a href="#">Zhang H</a>        | 6    |
| 18 | <a href="#">Baulcombe DC</a>   | 5    |
| 19 | <a href="#">Behlke MA</a>      | 5    |
| 20 | <a href="#">Carthew RW</a>     | 5    |

Author 1 - 20 of 1572

page

1

of 79

[Next](#)
